# Supplementary material
Source: Springer Nature journal article supplement (https://www.springermedizin.de/resource/supplementary/12955_2011_869_MOESM2_ESM.pdf/9561418)

**2ND ROUND OF INTERVIEWS****Patient 12**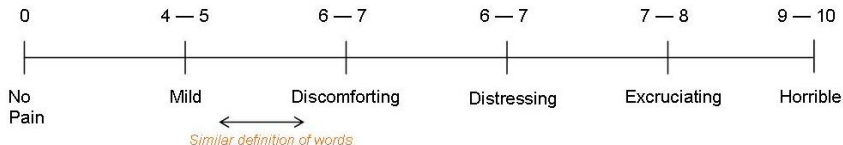**Patient 13**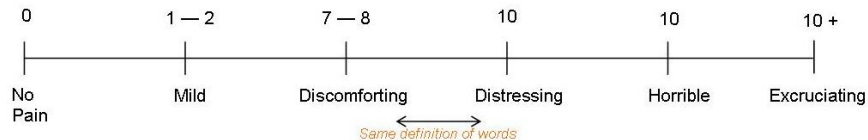**Patient 14**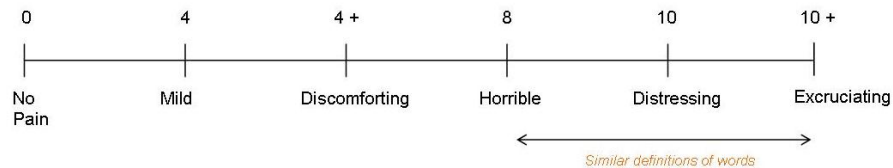**Patient 15**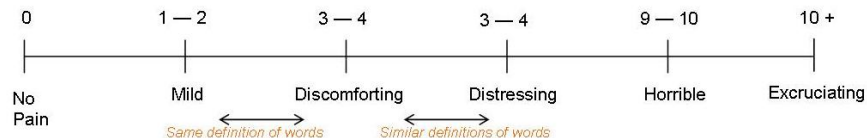**Patient 16**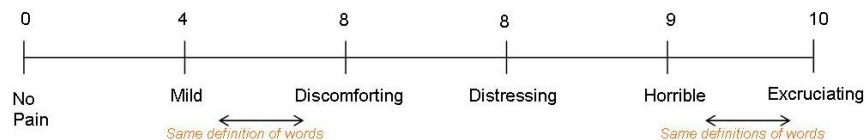

Supplement: MOESM2 [file 9561418]
